# Supplementary material
Source: publisher figshare collection journal article supplement (https://tandf.figshare.com/ndownloader/files/14480000)
Supplement: Supplementary file 1 [file 14480000]

Table S1. The Hammett constants, energetic (kJ mol-1), geometrical (Å) and topological parameters (a.u.). The last row corresponds to ternary FH...pyrazine…HF complex.

| X | σP | Equaternary | Ecoop | Esyn | EHB | q1 | q2 | HB  103 | E(2) |
| --- | --- | --- | --- | --- | --- | --- | --- | --- | --- |
| N(CH3)2 | -0.83 | -86.25 | -4.59 | -1.19 | 23.48 | -0.424 | 2.726 | 40.27 | 20.88 |
| NH2 | -0.66 | -85.92 | -4.50 | -0.83 | 23.44 | -0.424 | 2.726 | 40.25 | 20.86 |
| C(CH3)3 | -0.20 | -85.40 | -4.26 | -0.19 | 23.28 | -0.425 | 2.728 | 40.06 | 20.54 |
| CH3 | -0.17 | -85.25 | -4.31 | -0.16 | 23.35 | -0.425 | 2.727 | 40.14 | 20.72 |
| H | 0.00 | -85.49 | -4.20 | -0.39 | 23.28 | -0.425 | 2.727 | 40.06 | 20.64 |
| F | 0.06 | -84.13 | -3.89 | 1.21 | 23.21 | -0.426 | 2.727 | 40.04 | 20.54 |
| Cl | 0.23 | -84.02 | -3.79 | 1.41 | 23.19 | -0.426 | 2.727 | 40.04 | 20.54 |
| Br | 0.23 | -83.78 | -3.57 | 1.70 | 23.12 | -0.426 | 2.728 | 39.95 | 20.47 |
| CCH | 0.23 | -84.27 | -3.90 | 1.14 | 23.18 | -0.426 | 2.728 | 40.00 | 20.53 |
| BF2 | 0.48 | -83.20 | -3.57 | 2.23 | 23.07 | -0.427 | 2.729 | 39.87 | 20.36 |
| NC | 0.49 | -83.19 | -3.20 | 2.73 | 22.97 | -0.427 | 2.730 | 39.75 | 20.22 |
| CF3 | 0.54 | -83.22 | -3.33 | 2.43 | 23.03 | -0.427 | 2.729 | 39.81 | 20.30 |
| CN | 0.66 | -82.93 | -3.07 | 2.88 | 22.91 | -0.428 | 2.731 | 39.65 | 20.09 |
| NO2 | 0.78 | -82.48 | -2.95 | 3.23 | 22.94 | -0.427 | 2.730 | 39.74 | 20.13 |
| − | − | − | − | − | 23.15 | -0.426 | 2.728 | 39.96 | 20.51 |
